# Supplementary material for: The impact of comorbidities on post-operative complications following colorectal cancer surgery
Source: PubMed Central journal article supplement (PMC7757883; doi:10.1371/journal.pone.0243995), 2020-12-23
Supplement: pone.0243995.s001.pdf [file pone.0243995.s001.pdf]

Appendix I: Clavien-Dindo classifications of post-operative complications

|                          | Grades             | Definition                                                                                                                                                                                                                                                                                                                                                    |
|--------------------------|--------------------|---------------------------------------------------------------------------------------------------------------------------------------------------------------------------------------------------------------------------------------------------------------------------------------------------------------------------------------------------------------|
| Low Grade Complications  | Grade I            | Any deviation from the normal postoperative course without the need for pharmacological treatment or surgical, endoscopic and radiological interventions<br>Allowed therapeutic regimens are: drugs as antiemetic's, antipyretics, analgesics, diuretics and electrolytes and physiotherapy. This grade also includes wound infections opened at the bedside. |
|                          | Grade II           | Requiring pharmacological treatment with drugs other than such allowed for grade I complications. Blood transfusions and total parenteral nutrition are also included.                                                                                                                                                                                        |
| High Grade Complications | Grade III          | Requiring surgical, endoscopic or radiological intervention                                                                                                                                                                                                                                                                                                   |
|                          | - IIIa             | Intervention not under general anaesthesia                                                                                                                                                                                                                                                                                                                    |
|                          | - IIIb             | Intervention under general anaesthesia                                                                                                                                                                                                                                                                                                                        |
|                          | Grade IV           | Life-threatening complication (including CNS complications) requiring IC/ICU-management                                                                                                                                                                                                                                                                       |
|                          | - IVa              | Single organ dysfunction (including dialysis)                                                                                                                                                                                                                                                                                                                 |
|                          | - IVb              | Multi-organ dysfunction                                                                                                                                                                                                                                                                                                                                       |
| Grade V                  | Death of a patient |                                                                                                                                                                                                                                                                                                                                                               |
